# Supplementary material for: Expression of von Hippel–Lindau tumor suppressor protein (pVHL) characteristic of tongue cancer and proliferative lesions in tongue epithelium
Source: Springer Nature journal article supplement (doi:10.1186/s12885-017-3364-8), 2017-05-26
Supplement: MOESM1 [file 12318964]

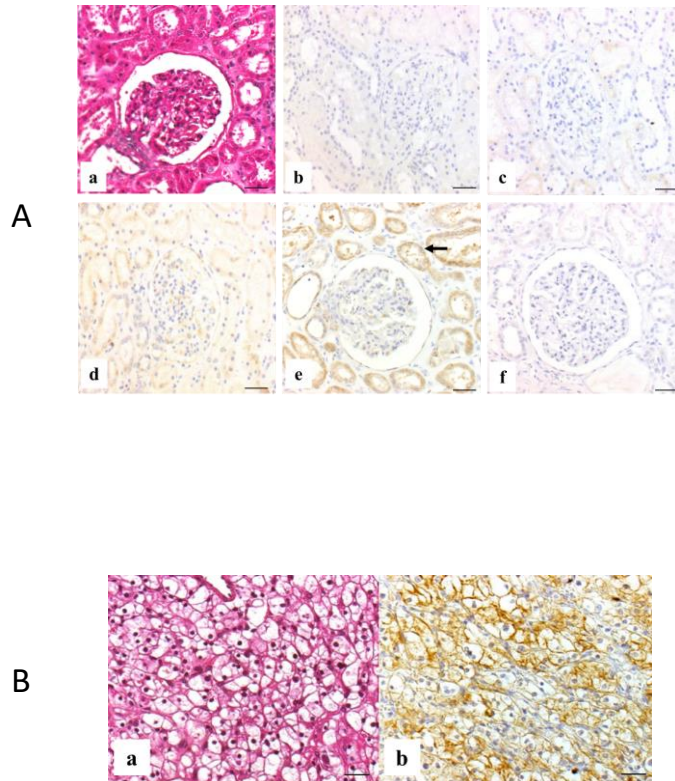

**Figure S1. Staining for pVHL in clear cell renal cell carcinoma (RCC). (A) Staining for pVHL in normal renal tissues treated with antigen retrieval. (a) Hematoxylin and eosin (HE) staining, (b-e) pVHL staining, (b) without antigen retrieval treatment, (c) trypsinization, (d) microwaving treatment, (e) heating and pressing in a cooking autoclave (arrow indicates proximal tubules), (f) heating and pressing in a cooking autoclave (negative control staining with unrelated monoclonal antibody). Bar, 50  $\mu$ m. (B) HE staining for pVHL in clear cell RCC. (a) HE staining and (b) staining for pVHL in clear cell renal cell carcinoma. Bar, 50  $\mu$ m.**
