# Supplementary material for: Expression of von Hippel–Lindau tumor suppressor protein (pVHL) characteristic of tongue cancer and proliferative lesions in tongue epithelium
Source: Springer Nature journal article supplement (doi:10.1186/s12885-017-3364-8), 2017-05-26
Supplement: MOESM2 [file 12318964]

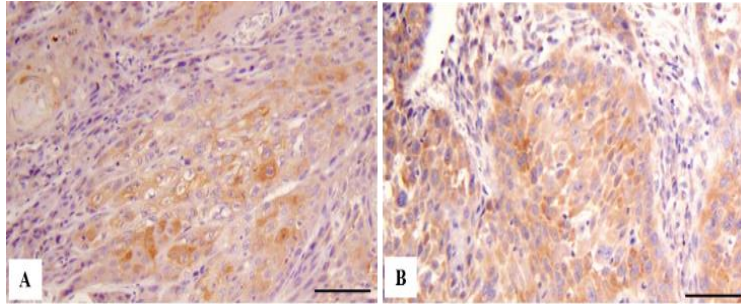

**Figure S2. Comparison of immunohistochemical staining for pVHL between LOH-positive and LOH-negative cases of invasive tongue cancer (well-differentiated).** (A) Staining for pVHL in an LOH-positive case, (B) staining for pVHL in an LOH-negative case. Bar, 25  $\mu$ m.
