# Supplementary material for: Expression of von Hippel–Lindau tumor suppressor protein (pVHL) characteristic of tongue cancer and proliferative lesions in tongue epithelium
Source: Springer Nature journal article supplement (doi:10.1186/s12885-017-3364-8), 2017-05-26
Supplement: MOESM3 [file 12318964]

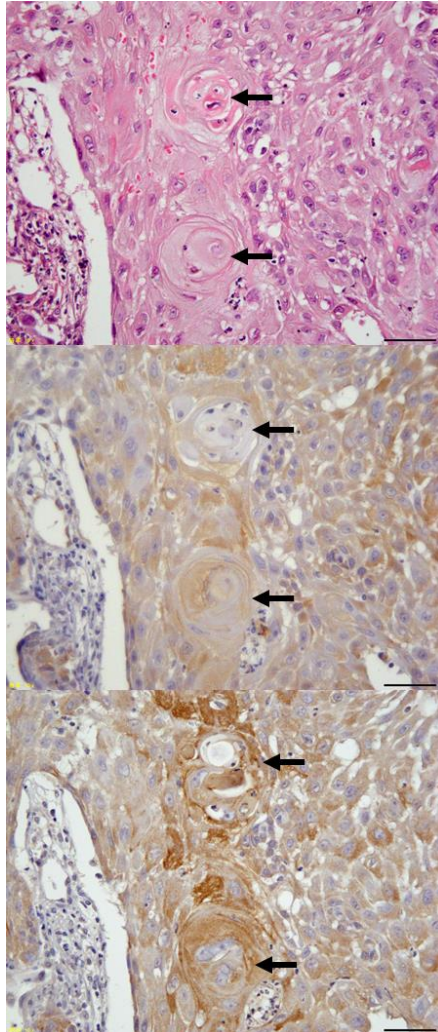

**Figure S3. Immunohistochemical staining of keratinized regions of well-differentiated squamous cell carcinoma.** Tissues stained with hematoxylin and eosin (upper), tissues immunohistologically stained for pVHL (middle), and tissues immunohistologically stained for CK17 (lower). Keratinized regions of squamous cell carcinoma were intensely stained for CK17 (arrows), while those same regions were not stained for pVHL.
